# Supplementary material for: Do Rumen Bacteroidetes Utilize an Alternative Mechanism for Cellulose Degradation?
Source: PubMed Central journal article supplement — mBio. 2014 Aug 5;5(4):e01401-14. doi: 10.1128/mBio.01401-14 (PMC4128358; doi:10.1128/mbio.01401-14), 2014-08-05
Supplement: mbo004141940sf01.pdf [file mbo004141940sf01.pdf]

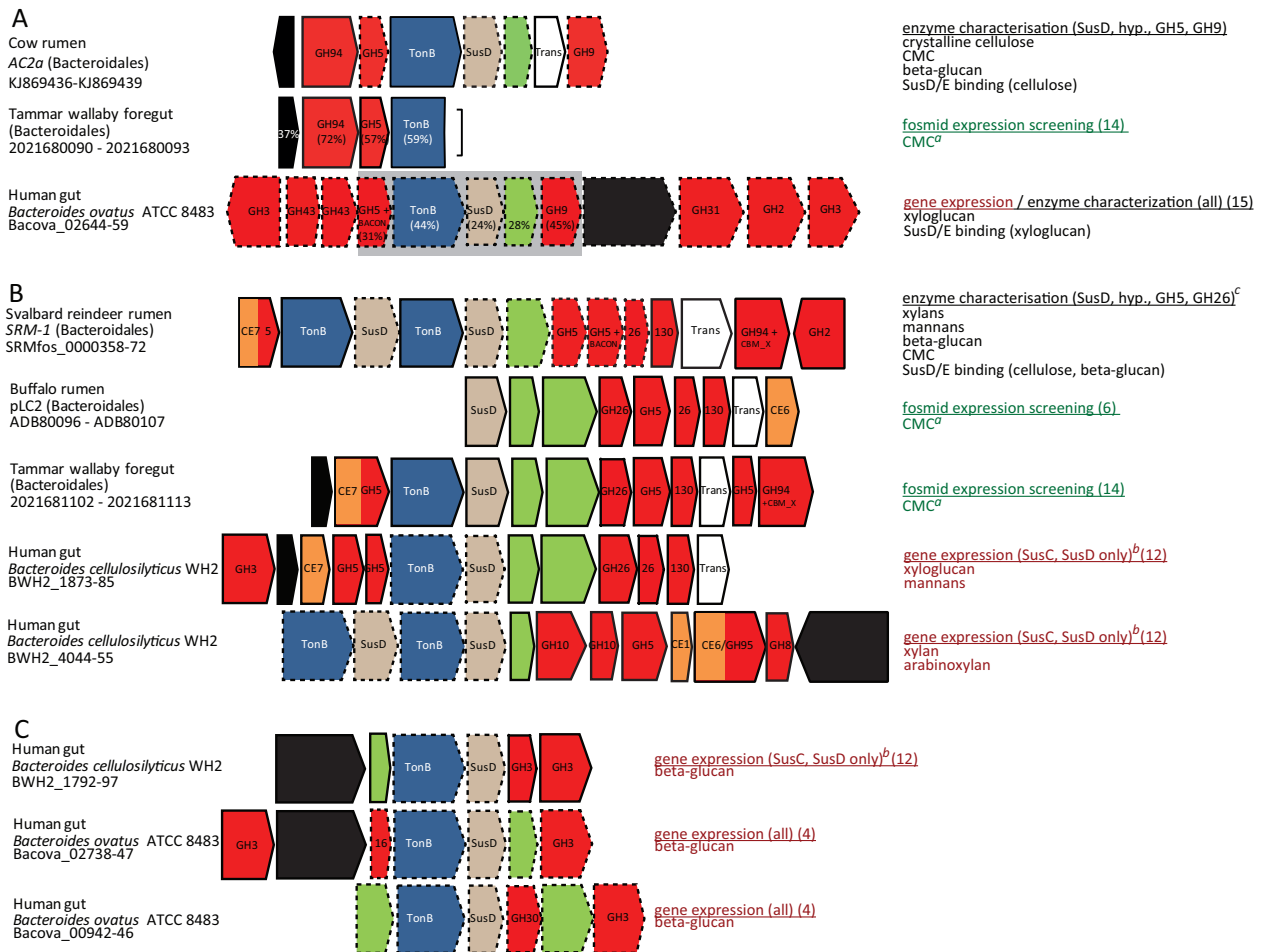

1

2 **Fig. S1. Identification of partially homologous/syntenic PULs encoding GH5 and/or GH9**  
 3 **representatives.** Genomic comparisons of the AC2a PUL were made with publicly-available  
 4 metagenomes, Bacteroidetes genomes and previously characterised PULs that encode either a GH5 or  
 5 GH9 representative. **a.** Sequence homology and synteny was observed with a partial metagenomic  
 6 fragment (bracket indicates fosmid terminus) derived from the Tammar wallaby foregut and the “core”  
 7 region (indicated by grey box) of a xyloglucan PUL from a human gut bacterium. Sequence identity is  
 8 indicated as a percentage in parentheses. **b.** PULs that encode GH5 and/or GH9 representatives; these  
 9 PULs all act on hemicellulose and there is no synteny. **c.** Example of previously characterised barley beta-  
 10 glucan PULs (gene expression) which have been shown to encode a GH3 ( $\beta$ -(1-3)-glucosidase) or a  
 11 GH16 ( $\beta$ -(1,3)-glucanase) and no GH5 and/or GH9 representatives. Text boxes to the left indicate the  
 12 source of the PUL and the gene locus/accession number. Text boxes to the right provide a characterisation  
 13 summary, including a listing of substrates for which activity has been demonstrated or inferred: black  
 14 print, biochemical characterisation; red print, inferred from gene expression only; green print, fosmid  
 15 screening. Green ORFs indicate SusE/F-positioned and other hypothetical proteins. Black ORFs indicate  
 16 putative transcriptional regulators. “Trans” indicates an inner membrane sugar transporter. Dashed lines  
 17 indicate genes the products of which have been characterized. References from main text are indicated in  
 18 parentheses.

19 <sup>a</sup> only CMC hydrolysis tested.

20 <sup>b</sup> only SusC and SusD gene expression analysed.

21 <sup>c</sup> A.K. Mackenzie, A.E. Naas, J. Mravec, S. Kracun, J. Schückel, J. Fangel, J.W. Agger, W.G.T.  
 22 Willats, V.G.H. Eijsink and P.B. Pope, submitted for publication, 2014.
