# Supplementary material for: Do Rumen Bacteroidetes Utilize an Alternative Mechanism for Cellulose Degradation?
Source: PubMed Central journal article supplement — mBio. 2014 Aug 5;5(4):e01401-14. doi: 10.1128/mBio.01401-14 (PMC4128358; doi:10.1128/mbio.01401-14), 2014-08-05
Supplement: mbo004141940sf02.pdf [file mbo004141940sf02.pdf]

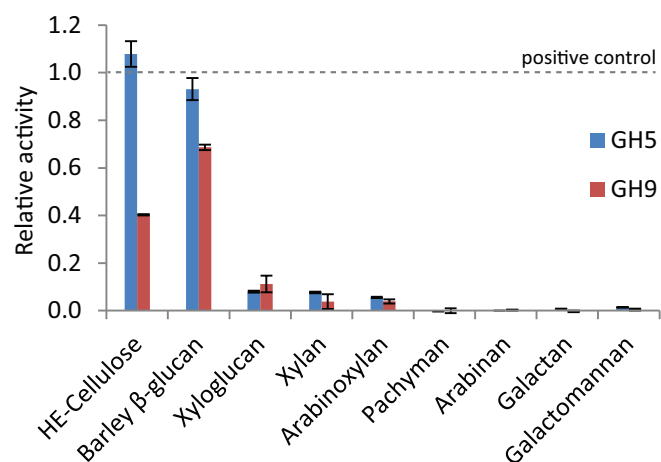

1  
 2 **Fig. S2. Substrates specificity screening of AC2a outer membrane enzymes.** Substrate  
 3 specificities of the GH5 and GH9 enzymes were determined by AZCL substrate screening.  
 4 Values are reported as relative absorbance calculated against the activity of the respective  
 5 positive control enzymes at 1 U/ml (for the controls the absorbance value was set to 1.0). An  
 6 overview of which enzymes were used as positive controls for the various substrates in the  
 7 substrate specificity screens is provided in **Table S3**.
