# Supplementary material for: Do Rumen Bacteroidetes Utilize an Alternative Mechanism for Cellulose Degradation?
Source: PubMed Central journal article supplement — mBio. 2014 Aug 5;5(4):e01401-14. doi: 10.1128/mBio.01401-14 (PMC4128358; doi:10.1128/mbio.01401-14), 2014-08-05
Supplement: mbo004141940sf03.pdf [file mbo004141940sf03.pdf]

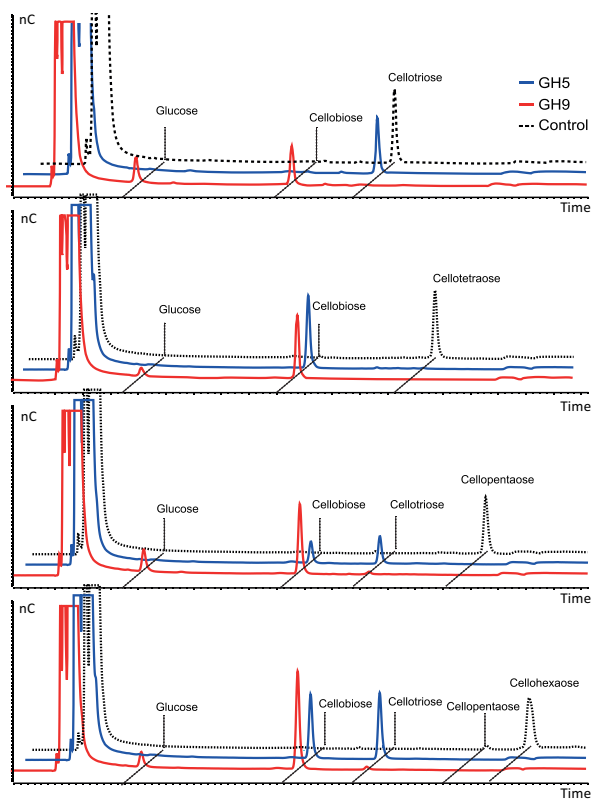

1  
 2 **Fig. S3. Analysis of products generated by AC2a GH5 and GH9 from oligomeric**  
 3 **substrates.** The figure shows HPAEC-PAD chromatograms of product mixtures obtained from  
 4 DP3-DP6 cellodextrins digested with GH5 or GH9 at pH 6.6. Enzyme assays were performed for  
 5 30 minutes at 40°C and enzymes were then inactivated by boiling for five minutes. Negative  
 6 controls without added enzymes and containing 0.1 mg/ml cellodextrins are included.
