# Supplementary material for: Do Rumen Bacteroidetes Utilize an Alternative Mechanism for Cellulose Degradation?
Source: PubMed Central journal article supplement — mBio. 2014 Aug 5;5(4):e01401-14. doi: 10.1128/mBio.01401-14 (PMC4128358; doi:10.1128/mbio.01401-14), 2014-08-05
Supplement: mbo004141940sf04.pdf [file mbo004141940sf04.pdf]

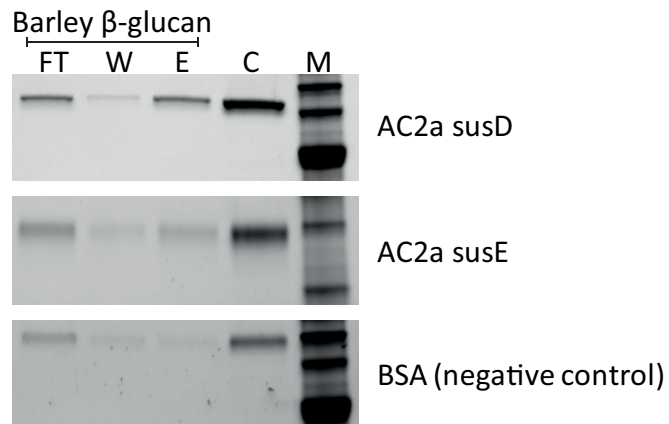

1  
2 **Fig. S4. Binding of AC2a SusD-like and SusE-positioned proteins to barley  $\beta$ -glucan.** SDS-  
3 PAGE gel analysis of fractions from pull-down assays. (FT) marks unbound protein from  
4 supernatant fractions collected after 1 hr incubation and centrifugation. (W) marks the wash  
5 fraction, containing protein in washed off the substrate, while (E) marks eluted protein fractions  
6 where protein was released from the polysaccharides by incubation with 2% SDS. (C) marks  
7 control lanes, where only the protein was loaded on the gel. (M) marks a molecular weight  
8 standard (BenchMark, Life Technologies).
