# Supplementary material for: Do Rumen Bacteroidetes Utilize an Alternative Mechanism for Cellulose Degradation?
Source: PubMed Central journal article supplement — mBio. 2014 Aug 5;5(4):e01401-14. doi: 10.1128/mBio.01401-14 (PMC4128358; doi:10.1128/mbio.01401-14), 2014-08-05
Supplement: mbo004141940st1.pdf [file mbo004141940st1.pdf]

**Table S1. Activity of the AC2a PUL endoglucanases on various glycans.** Previously calculated specificities for example endoglucanases characterized from rumen bacteria (Cel9B from *Fibrobacter succinogenes* and CelA from *Butyrivibrio fibrisolvens*) are listed.

| Substrate              | <sup>a</sup> Substrate specificity (U/mg) $\pm$ <sup>b</sup> SD |                   |                                                        |                                                       |
|------------------------|-----------------------------------------------------------------|-------------------|--------------------------------------------------------|-------------------------------------------------------|
|                        | GH5<br>(AC2a)                                                   | GH9<br>(AC2a)     | <sup>c</sup> Cel9B (GH9)<br>( <i>F. succinogenes</i> ) | <sup>d</sup> CelA (GH5)<br>( <i>B. fibrisolvens</i> ) |
| CMC                    | 216.8 $\pm$ 8.9                                                 | 55.14 $\pm$ 4.21  | 25.0 $\pm$ 5.13                                        | 0.2                                                   |
| Avicel                 | 0.115 $\pm$ 0.025                                               | 0.030 $\pm$ 0.008 | 0.05 $\pm$ 0.02                                        | 0.006                                                 |
| Filter paper           | 0.152 $\pm$ 0.005                                               | 0.035 $\pm$ 0.01  | na                                                     | 0.0006                                                |
| Barley $\beta$ -glucan | 1471.4 $\pm$ 97.3                                               | 296.11 $\pm$ 7.24 | 47.78 $\pm$ 1.96                                       | 1.4                                                   |

<sup>a</sup> one unit of enzyme activity is the amount that produces 1  $\mu$ mol of product per min.

<sup>b</sup> assays performed in triplicate.

<sup>c</sup> substrate specificity measurements: M. Qi, H-S. Jun, and C.W. Forsberg, Appl. Environ. Microbiol, **73**:6098-6105, 2007. Cel9B is a major cellulase secreted by the rumen bacterium *F. succinogenes* S85 accounting for approximately 32% of the total endoglucanase activity present in the nonsedimentable fraction (M. McGavin, and C.W. Forsberg, J. Bacteriol. **170**:2914–2922, 1988).

<sup>d</sup> substrate specificity measurements: G.P. Hazlewood, K. Davidson, J.I. Laurie, M.P. Romaniec, and H.J. Gilbert, J Gen Microbiol, **136**:2089-2097, 1990.
