# Supplementary material for: Do Rumen Bacteroidetes Utilize an Alternative Mechanism for Cellulose Degradation?
Source: PubMed Central journal article supplement — mBio. 2014 Aug 5;5(4):e01401-14. doi: 10.1128/mBio.01401-14 (PMC4128358; doi:10.1128/mbio.01401-14), 2014-08-05
Supplement: mbo004141940st2.pdf [file mbo004141940st2.pdf]

**Table S2. Primers used to clone *AC2a* proteins**

| <b>Primer name</b>   | <b>Sequence</b>                                      | <b>Acc. number</b> | <b><sup>a</sup>Gene</b> |
|----------------------|------------------------------------------------------|--------------------|-------------------------|
| <b>SusD_f_NT_LIC</b> | TTAAGAAGGAGATATACTATGAGTGATGAAATTTATGAAGAGATTAACACC  | KJ869436           | figl171549.4.peg.119    |
| <b>SusD_f_CT_LIC</b> | AATGGTGGTGATGATGGTGCGCTTTAACATCCCACCACAGACGTGCATGCCA | KJ869436           | figl171549.4.peg.119    |
| <b>SusE_f_NT_LIC</b> | TTAAGAAGGAGATATACTATGAATCCGCAAGAACCGTTTGATACCCAGAGT  | KJ869437           | figl171549.4.peg.118    |
| <b>SusE_f_CT_LIC</b> | AATGGTGGTGATGATGGTGCGCTTTATAGGTGATTTTCGTAACATTCAGACC | KJ869437           | figl171549.4.peg.118    |
| <b>GH5_c_NT_LIC</b>  | TTAAGAAGGAGATATACTATGAATGCACAAGAAAAAAAAACGTCGTCCGATG | KJ869438           | figl171549.4.peg.121    |
| <b>GH5_c_CT_LIC</b>  | AATGGTGGTGATGATGGTGCGCTTTACGGCTGCTTTCCGGTGCGCTATCATA | KJ869438           | figl171549.4.peg.121    |
| <b>GH9_h_NT_LIC</b>  | TTAAGAAGGAGATATACTATGAAACATAGCGCAAGCCAGCAGGTTTCGTCTG | KJ869439           | figl171549.4.peg.116    |
| <b>GH9_h_CT_LIC</b>  | AATGGTGGTGATGATGGTGCGCACGACCCAGTGCATCCAGGCCTGCGCTCAG | KJ869439           | figl171549.4.peg.116    |

<sup>a</sup> Corresponds to Feature ID from the RAST genome submission 171549.4: undefined AC2a (Taxonomy ID: 171549)
