# Supplementary material for: Do Rumen Bacteroidetes Utilize an Alternative Mechanism for Cellulose Degradation?
Source: PubMed Central journal article supplement — mBio. 2014 Aug 5;5(4):e01401-14. doi: 10.1128/mBio.01401-14 (PMC4128358; doi:10.1128/mbio.01401-14), 2014-08-05
Supplement: mbo004141940st3.pdf [file mbo004141940st3.pdf]

**Table S3. Commercial enzymes used as positive controls for AZCL substrate specificity screening.**

| <b>Substrate</b>                        | <b>Enzyme used for positive control</b>                              | <b>Megazyme Catalog. No.</b> | <b>Preferred pH</b> |
|-----------------------------------------|----------------------------------------------------------------------|------------------------------|---------------------|
| <b>Beechwood Xylan</b>                  | <i>endo</i> -1,4- $\beta$ -Xylanase ( <i>Cellvibrio japonicus</i> )  | E-XYNACJ                     | 5.5                 |
| <b>Xyloglucan</b>                       | Xyloglucanase (GH5) ( <i>Paenibacillus</i> sp.)                      | E-XEGP                       | 5.5                 |
| <b>Barley-<math>\beta</math>-glucan</b> | <i>endo</i> -1,3- $\beta$ -glucanase                                 | E-LAMVH                      | 4.5                 |
| <b>HE-cellulose</b>                     | <i>endo</i> -cellulase (EGII) ( <i>Trichoderma longibrachiatum</i> ) | E-CELTR                      | 4.5                 |
| <b>Arabinan</b>                         | <i>endo</i> -arabinase                                               | E-EARAB                      | 4.0                 |
| <b>Arabinoxylan</b>                     | <i>endo</i> -1,4- $\beta$ -Xylanase ( <i>Cellvibrio japonicus</i> )  | E-XYNACJ                     | 5.5                 |
| <b>Galactan</b>                         | <i>endo</i> -1,4- $\beta$ -Galactanase                               |                              | 4.0                 |
| <b>Galactomannan</b>                    | <i>endo</i> -1,4- $\beta$ -Mannanase ( <i>Cellvibrio japonicus</i> ) | E-BMACJ                      | 7.0                 |
| <b>Pachyman</b>                         | <i>endo</i> -1,3- $\beta$ -glucanase                                 | E-LAMVH                      | 4.5                 |
| <b>Rhamno-galacturonan I</b>            | Pectate lyase ( <i>Cellvibrio japonicus</i> )                        | E-PLYCJ                      | 10.0                |

The preferred pH of the enzyme was used for the respective positive controls during the assay.
